# Supplementary material for: Integrating comprehensive two-dimensional gas chromatography mass spectrometry and parallel two-dimensional liquid chromatography mass spectrometry for untargeted metabolomics
Source: Royal Society of Chemistry journal article supplement (doi:10.1039/c9an00560a), 2019-01-01
Supplement: c9an00560a1.pdf [file c9an00560a1.pdf]

# Integrating Comprehensive Two-dimensional Gas Chromatography Mass Spectrometry and Parallel Two-dimensional Liquid Chromatography Mass Spectrometry for Untargeted Metabolomics

*Md Aminul Islam Prodhan*<sup>1,2,3,4</sup>, *Biyun Shi*<sup>1,4</sup>, *Ming Song*<sup>2,3,6</sup>, *Liqing He*<sup>1,2,3,4</sup>, *Fang Yuan*<sup>1,2,3,4</sup>,  
*Xinmin Yin*<sup>1,4</sup>, *Patrick Bohman*<sup>8</sup>, *Craig McClain*<sup>2,3,5,6,7</sup>, *Xiang Zhang*<sup>1,2,3,4,5</sup>

<sup>1</sup>Department of Chemistry, <sup>2</sup>University of Louisville Alcohol Research Center, <sup>3</sup>University of Louisville Hepatobiology & Toxicology Program, <sup>4</sup>Center for Regulatory and Environmental Analytical Metabolomics, <sup>5</sup> Department of Pharmacology & Toxicology, <sup>6</sup> Department of Medicine, University of Louisville, Louisville, KY 40208, USA, <sup>7</sup>Robley Rex Louisville VAMC, Louisville, Kentucky 40292, USA, <sup>8</sup>Thermo Fisher Scientific International Inc., 3000 Lakeside Dr., Bannockburn, IL, 60015, USA

\*CORRESPONDING AUTHOR

Prof. Xiang Zhang, Department of Chemistry, University of Louisville, **2210 South Brook Street, Louisville, KY 40208, USA. Phone:** +01 502 852 8878. Fax: +01 502 852 8149. E-mail: [xiang.zhang@louisville.edu](mailto:xiang.zhang@louisville.edu).

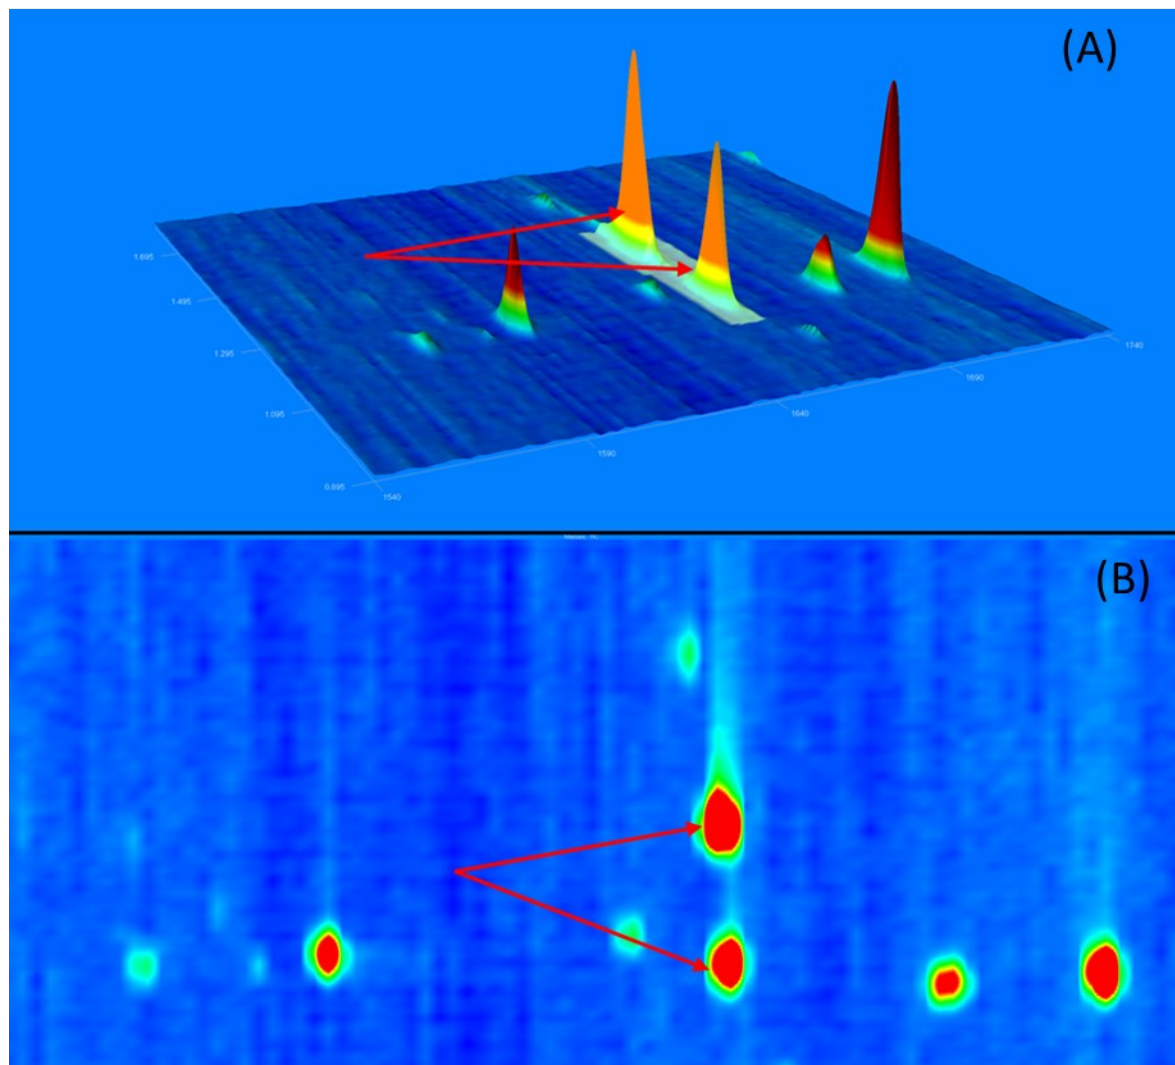

**Figure S1.** Two compounds co-eluted from the first dimension GC but separated by the second dimension GC. (A) is a three-dimensional view, and (B) is a contour plot.

**Table S1.** Data processing parameters used in LECO ChromaTOF software

| Data processing parameters used in LECO ChromaTOF.      |                         |
|---------------------------------------------------------|-------------------------|
| Baseline Offset                                         | 1                       |
| Number of Data Points Averaged for Baseline Smoothing   | Auto                    |
| Peak Width for Peak Finding                             | GC-MS: 4, GC×GC-MS: 7.5 |
| Minimum Number of Apexing Masses for Peak Finding       | 2                       |
| Minimum SNR for Peak Finding                            | 10                      |
| Library Search Mode                                     | Normal, Forward         |
| Library Hits Returned per Peak                          | 10                      |
| Minimum/Maximum Molecular Weight Allowed                | 29/850                  |
| Relative Mass Threshold for Library Searching           | 10                      |
| Minimum Similarity Match Before Name is Assigned        | 600                     |
| Libraries Used for Searching                            | In-House, NIST-14       |
| Mass Used for Area/Height Calculation                   | Unique                  |
| Match Required to Combine Peaks in the Second Dimension | 500                     |
| Second Dimension Peak Width                             | 0.15                    |
| Minimum SNR for Subpeak to be Retained                  | 6                       |
| Integration Approach                                    | Traditional             |

**Table S2.** Details of metabolites identified by MS/MS matching in 2DLC-MS (-) mode

| Name                                | <i>m/z</i> | Retention time (min) | Database                 |
|-------------------------------------|------------|----------------------|--------------------------|
| (±)13-HODE                          | 295.2273   | 13.96                | In-house DB <sup>a</sup> |
| (R)-2-Hydroxybutyric acid           | 103.0399   | 2.13                 | In-house DB              |
| 2-Hydroxycaproic acid               | 131.0712   | 2.45                 | CD <sup>b</sup>          |
| 2-Methylglutaric acid               | 145.0505   | 2.17                 | CD                       |
| 2-Oxobutyric acid                   | 101.0242   | 5.54                 | CD                       |
| 2-Oxoglutaric acid                  | 145.0141   | 5.36                 | CD                       |
| 2-Phosphoglycerate (2PG)            | 184.9854   | 0.88                 | In-house DB              |
| 3-AMP                               | 346.0552   | 1.20                 | In-house DB              |
| 3-Hydroxybutyric acid               | 103.0400   | 1.68                 | In-house DB              |
| 3-Phosphoglyceric acid              | 184.9854   | 6.30                 | CD                       |
| 4-Dodecylbenzenesulfonic acid       | 325.1837   | 4.52                 | CD                       |
| 4-Methyl-2-oxovaleric acid          | 129.0556   | 7.53                 | In-house DB              |
| 4-Oxoproline                        | 128.0352   | 4.53                 | CD                       |
| 5-CMP                               | 322.0443   | 0.94                 | In-house DB              |
| Alanine                             | 88.0402    | 0.83                 | In-house DB              |
| Alpha-D-Glucose 1-phosphate         | 259.0234   | 0.83                 | In-house DB              |
| alpha ketoglutaric acid             | 145.0141   | 1.15                 | In-house DB              |
| Arabitol                            | 151.0610   | 5.16                 | CD                       |
| Asparagine                          | 131.0461   | 0.83                 | In-house DB              |
| Aspartic Acid                       | 132.0301   | 0.83                 | In-house DB              |
| Azelaic acid                        | 187.0974   | 9.05                 | In-house DB              |
| Benzoic acid                        | 121.0294   | 0.10                 | CD                       |
| Citrate                             | 191.0196   | 1.21                 | In-house DB              |
| Citrulline                          | 174.0882   | 0.85                 | In-house DB              |
| Cystathionine                       | 221.0598   | 0.80                 | In-house DB              |
| D-Erythrose-4-phosphate             | 199.0011   | 0.88                 | In-house DB              |
| D-Glucosamine-6-phosphate           | 258.0381   | 5.97                 | In-house DB              |
| D-Glucose (Glc)                     | 179.0559   | 0.88                 | In-house DB              |
| D-Glucose 6-phosphate               | 259.0218   | 6.20                 | CD                       |
| D-Glyceraldehyde 3-Phosphate (GADP) | 168.9905   | 0.91                 | In-house DB              |
| Dihydroxyacetone Phosphate (DHAP)   | 168.9905   | 4.96                 | In-house DB              |
| DL-alpha-Glycerol phosphate         | 171.0062   | 0.86                 | In-house DB              |
| DL-β-Leucine                        | 130.0872   | 4.96                 | CD                       |
| Dodecanedioic acid                  | 229.1442   | 9.59                 | CD                       |
| D-Ribulose-5-phosphate              | 229.0116   | 0.85                 | In-house DB              |

|                               |          |       |             |
|-------------------------------|----------|-------|-------------|
| D-Saccharic acid              | 209.0300 | 0.86  | CD          |
| Esculin                       | 339.0735 | 0.89  | CD          |
| Ethyl- $\beta$ -D-glucuronide | 221.0665 | 1.46  | CD          |
| Fructose                      | 179.0559 | 5.56  | CD          |
| Fumaric acid                  | 115.0036 | 1.53  | In-house DB |
| Glutamic acid                 | 146.0457 | 0.85  | In-house DB |
| Glutamine                     | 145.0617 | 5.74  | CD          |
| Glutaric acid                 | 131.0349 | 2.44  | In-house DB |
| Glutathione                   | 306.0761 | 1.15  | In-house DB |
| Glycerol 3-phosphate          | 171.0062 | 5.75  | CD          |
| Glycine                       | 74.0246  | 0.83  | In-house DB |
| Glycyl-L-leucine              | 187.1086 | 5.25  | CD          |
| Histidine                     | 154.0620 | 0.79  | In-house DB |
| Hypotaurine                   | 108.0123 | 5.70  | CD          |
| Hypoxanthine                  | 135.0311 | 1.18  | CD          |
| Inosine                       | 267.0732 | 1.60  | In-house DB |
| Isobutyric acid               | 87.0450  | 2.45  | In-house DB |
| Isocitric acid                | 191.0195 | 0.89  | In-house DB |
| Isoleucine                    | 130.0872 | 1.75  | In-house DB |
| Itaconic acid                 | 129.0192 | 6.16  | CD          |
| Lactic acid                   | 89.0243  | 1.24  | In-house DB |
| L-alpha-Aminoadipic acid      | 160.0614 | 0.90  | In-house DB |
| L-alpha-Amino-n-butyric acid  | 102.0559 | 0.85  | In-house DB |
| L-Ascorbic acid 2-sulfate     | 254.9813 | 0.97  | CD          |
| Leukotriene B4                | 335.2224 | 2.42  | In-house DB |
| Levulinic acid                | 115.0400 | 2.43  | In-house DB |
| Glutathione reduced           | 306.0760 | 5.62  | CD          |
| L-Glutathione oxidized        | 611.1434 | 1.17  | CD          |
| Lipoxin A4                    | 351.2171 | 2.43  | In-house DB |
| Lipoxin B4                    | 351.2174 | 10.39 | In-house DB |
| Phenylalanine                 | 164.0716 | 4.93  | CD          |
| Pyroglutamic acid             | 128.0352 | 1.35  | In-house DB |
| Serine                        | 104.0352 | 5.96  | CD          |
| Lysine                        | 145.0981 | 0.75  | In-house DB |
| Malic acid                    | 133.0141 | 1.04  | In-house DB |
| Maleic acid                   | 115.0035 | 1.20  | In-house DB |
| Malonic acid                  | 103.0036 | 1.11  | In-house DB |
| Maltose                       | 341.1083 | 5.74  | CD          |
| Mannitol                      | 181.0715 | 5.36  | CD          |
| Mesaconic acid                | 129.0192 | 0.89  | CD          |
| Methionine                    | 148.0437 | 1.21  | In-house DB |

|                                               |          |       |             |
|-----------------------------------------------|----------|-------|-------------|
| Monobutyl phthalate                           | 221.0817 | 10.73 | CD          |
| N-Acetylalanine                               | 130.0508 | 1.65  | CD          |
| N-Acetyl-alpha-D-glucosamine 1-phosphate      | 300.0485 | 0.84  | In-house DB |
| N-Acetyl-D-Glucosamine                        | 220.0823 | 0.95  | In-house DB |
| N-Acetyl-L-glutamic acid                      | 188.0562 | 1.22  | In-house DB |
| N-Acetyl-L-glutamine                          | 187.0722 | 4.61  | CD          |
| N-Acetylneuraminic acid                       | 308.0982 | 0.91  | CD          |
| N-Acetyl- $\alpha$ -D-glucosamine 1-phosphate | 300.0484 | 5.85  | CD          |
| Nicotinic acid                                | 122.0246 | 1.16  | In-house DB |
| N- $\alpha$ -Acetyl-L-asparagine              | 173.0565 | 5.79  |             |
| O-Phosphoethanolamine                         | 140.0117 | 0.82  | In-house DB |
| O-Phosphorylethanolamine                      | 140.0117 | 6.22  | CD          |
| Ornithine                                     | 131.0824 | 0.78  | In-house DB |
| Orotic acid                                   | 155.0097 | 4.85  | CD          |
| Oxalic acid                                   | 88.9879  | 0.89  | In-house DB |
| Pantothenic acid                              | 218.1032 | 3.97  | CD          |
| Phosphoenolpyruvate                           | 166.9749 | 0.90  | In-house DB |
| Phosphoenolpyruvic acid                       | 166.9750 | 6.03  | CD          |
| Prostaglandin G2                              | 367.2113 | 2.63  | In-house DB |
| Pyruvate                                      | 87.0086  | 1.07  | In-house DB |
| Quinolinic Acid                               | 166.0147 | 1.19  | In-house DB |
| Ribose                                        | 149.0454 | 4.81  | CD          |
| Salicylic acid                                | 137.0243 | 9.35  | In-house DB |
| Succinate                                     | 117.0193 | 1.61  | In-house DB |
| Sucrose                                       | 341.1083 | 0.89  | In-house DB |
| Taurine                                       | 124.0072 | 0.85  | In-house DB |
| Taurochenodeoxycholic acid                    | 498.2890 | 9.71  | CD          |
| Thiamine                                      | 263.0967 | 0.78  | In-house DB |
| Threonine                                     | 118.0508 | 0.86  | In-house DB |
| trans-4-Hydroxy-L-proline                     | 130.0508 | 0.89  | In-house DB |
| trans-Ferulic acid                            | 193.0506 | 2.43  | In-house DB |
| Tryptophan                                    | 203.0825 | 5.12  | CD          |
| Tyrosine                                      | 180.0665 | 1.20  | In-house DB |
| UMP                                           | 323.0279 | 1.08  | In-house DB |
| Uracil                                        | 111.0199 | 1.15  | CD          |
| Uric acid                                     | 167.0209 | 1.12  | CD          |
| Uridine                                       | 243.0618 | 4.57  | CD          |
| Valine                                        | 116.0716 | 1.05  | In-house DB |
| Xanthine                                      | 151.0260 | 1.32  | CD          |

|                                    |          |      |    |
|------------------------------------|----------|------|----|
| Xanthosine                         | 283.0679 | 4.72 | CD |
| $\alpha$ -D-Mannose 1-phosphate    | 259.0219 | 6.02 | CD |
| $\beta$ -D-Glucopyranuronic acid   | 193.0351 | 6.05 | CD |
| $\delta$ -Ribono-1,4-lactone       | 147.0297 | 5.91 | CD |
| $\gamma$ -Aminobutyric acid (GABA) | 102.0559 | 5.91 | CD |

<sup>a</sup> In-house database

<sup>b</sup> Compound Discoverer database

**Table S3.** Details of metabolites identified by MS/MS matching in 2DLC-MS (+) mode

| Name                       | <i>m/z</i> | Retention time (min) | MS/MS database           |
|----------------------------|------------|----------------------|--------------------------|
| 1-Methyl-L-histidine       | 170.0920   | 0.75                 | In-house DB <sup>a</sup> |
| 2-Aminobutyric acid        | 104.0704   | 5.39                 | CD <sup>b</sup>          |
| 3-Aminobutanoic acid       | 104.0704   | 0.87                 | In-house DB              |
| 3-Hydroxypyridine          | 96.0442    | 0.93                 | In-house DB              |
| 4-Acetamidobutanoic acid   | 146.0810   | 5.38                 | CD                       |
| 4-Guanidinobutyric acid    | 146.0922   | 1.03                 | CD                       |
| 4-Indolecarbaldehyde       | 146.0599   | 5.08                 | CD                       |
| 4-Methyl-5-thiazoleethanol | 144.0476   | 6.18                 | CD                       |
| 5-Aminovaleric acid        | 118.0861   | 0.88                 | In-house DB              |
| 5-Methylcytosine           | 126.0660   | 1.19                 | CD                       |
| Alanine                    | 90.0548    | 0.84                 | In-house DB              |
| alpha-Amino adipic acid    | 162.0757   | 0.93                 | In-house DB              |
| Arginine                   | 175.1187   | 7.18                 | CD                       |
| Asparagine                 | 133.0606   | 5.84                 | CD                       |
| Aspartic acid              | 134.0446   | 6.23                 | CD                       |
| Betaine                    | 118.0861   | 5.06                 | CD                       |
| Carnitine                  | 162.1123   | 4.31                 | CD                       |
| Choline                    | 104.1068   | 0.83                 | CD                       |
| cis-4-Hydroxy-D-proline    | 132.0655   | 5.57                 | CD                       |
| Citrulline                 | 176.1027   | 0.85                 | In-house DB              |
| Creatine                   | 132.0766   | 5.85                 | CD                       |
| Cystathionine              | 223.0738   | 0.81                 | In-house DB              |
| Cystine                    | 241.0303   | 6.29                 | CD                       |
| Cytosine                   | 112.0504   | 6.22                 | CD                       |
| D-Serine                   | 106.0497   | 6.02                 | CD                       |
| Ethanolamine               | 62.0601    | 0.80                 | In-house DB              |
| Glucose 1-phosphate        | 261.0361   | 6.28                 | CD                       |
| Glutamic acid              | 148.0604   | 5.88                 | CD                       |
| Glutamine                  | 147.0762   | 0.86                 | In-house DB              |
| Glycine                    | 76.0392    | 0.81                 | In-house DB              |
| Histidine                  | 156.0765   | 0.79                 | In-house DB              |
| Homoserine                 | 120.0655   | 5.74                 | CD                       |
| Hypotaurine                | 110.0269   | 5.72                 | CD                       |
| Hypoxanthine               | 137.0456   | 4.62                 | CD                       |
| Isoleucine                 | 132.1017   | 1.75                 | In-house DB              |
| Leucine                    | 132.1019   | 1.87                 | In-house DB              |
| Leucylproline              | 229.1539   | 4.81                 | CD                       |



|                                   |          |      |             |
|-----------------------------------|----------|------|-------------|
| Lysine                            | 147.1126 | 7.04 | CD          |
| Methionine                        | 150.0582 | 1.20 | In-house DB |
| Methylimidazoleacetic acid        | 141.0658 | 5.74 | CD          |
| N3,N4-Dimethyl-L-arginine         | 203.1497 | 6.15 | CD          |
| N6,N6,N6-Trimethyl-L-lysine       | 189.1595 | 6.31 | CD          |
| N6-Acetyl-L-lysine                | 189.1231 | 1.02 | CD          |
| N-Acetyl-D-galactosamine          | 222.0968 | 5.59 | CD          |
| N-Acetyl-D-Glucosamine            | 222.0965 | 0.92 | In-house DB |
| N-Acetyl-L-glutamic acid          | 190.0708 | 1.44 | In-house DB |
| N-Acetyl- $\alpha$ -D-glucosamine | 222.0967 | 5.23 | CD          |
| Nicotinamide                      | 123.0551 | 1.18 | CD          |
| Nicotinic acid                    | 124.0391 | 1.17 | In-house DB |
| O-Phosphoethanolamine             | 142.0261 | 0.82 | In-house DB |
| Ornithine                         | 133.0969 | 0.75 | In-house DB |
| Phenylalanine                     | 166.0860 | 3.00 | In-house DB |
| Phosphoenolpyruvate               | 168.9894 | 0.92 | In-house DB |
| Pipecolic acid                    | 130.0860 | 0.75 | CD          |
| Proline                           | 116.0704 | 5.31 | CD          |
| Pyridoxal                         | 168.0651 | 0.92 | CD          |
| Pyroglutamic acid                 | 130.0497 | 5.74 | CD          |
| Serine                            | 106.0497 | 0.83 | In-house DB |
| Stachydrine                       | 144.1017 | 0.91 | CD          |
| Taurine                           | 126.0219 | 5.61 | CD          |
| Threonine                         | 120.0653 | 0.85 | In-house DB |
| Tryptophan                        | 205.0967 | 5.08 | CD          |
| Tyrosine                          | 182.0810 | 1.44 | In-house DB |
| Uracil                            | 113.0344 | 4.53 | CD          |
| Urea                              | 61.0397  | 0.92 | In-house DB |
| Uric acid                         | 169.0353 | 5.28 | CD          |
| Urocanic acid                     | 139.0500 | 1.03 | CD          |
| Valine                            | 118.0861 | 4.33 | In-house DB |
| Y-Aminobutyric acid<br>(GABA)     | 104.0704 | 6.11 | CD          |

<sup>a</sup> In-house database

<sup>b</sup> Compound Discoverer database

**Table S4.** Metabolites in rat liver detected with significant changes in their abundance levels between G1 and G2 by different platforms

| Metabolite ID | Metabolite name                  | <i>p</i> -value | Fold-change |
|---------------|----------------------------------|-----------------|-------------|
| GC×GC-MS      |                                  |                 |             |
| 1             | 1,2-Benzisothiazol-3-amine       | 4.3E-04         | 0.8         |
| 2             | 1-Butanol                        | 2.2E-02         | 0.9         |
| 3             | 2-Pyrrolidone-5-carboxylic acid  | 7.4E-04         | 0.5         |
| 4             | 3-Aminobutyric acid              | 1.9E-02         | 0.6         |
| 5             | 3-Hydroxy-3-phenylpropionic acid | 1.5E-02         | 1.4         |
| 6             | 3-Hydroxybutyric acid            | 2.5E-02         | 0.5         |
| 7             | 5-chloroindoline-2,3-dione       | 2.6E-02         | 0.7         |
| 8             | 5-Hexen-1-ol                     | 3.0E-02         | 0.7         |
| 9             | Acetimidamide                    | 3.5E-02         | 0.6         |
| 10            | Alanylglycine                    | 9.3E-03         | 1.9         |
| 11            | Benzoic Acid                     | 2.7E-02         | 1.3         |
| 12            | cis-11,14-Eicosadienoic acid     | 1.2E-02         | 1.8         |
| 13            | DL-Glyceraldehyde                | 1.0E-02         | 0.1         |
| 14            | Doconexent                       | 5.5E-04         | 1.4         |
| 15            | Eicosapentaenoic Acid            | 2.1E-02         | 2.2         |
| 16            | Ethanolamine                     | 3.8E-03         | 0.5         |
| 17            | Heptadecanoic acid               | 3.4E-04         | 1.8         |
| 18            | Hypoxanthine                     | 8.6E-04         | 0.7         |
| 19            | Isobutyl alcohol                 | 9.1E-05         | 0.7         |
| 20            | L-Aspartic acid                  | 5.4E-04         | 0.5         |
| 21            | L-Glutamine                      | 4.5E-02         | 0.6         |
| 22            | L -Leucine                       | 4.5E-02         | 0.7         |
| 23            | L -Lysine                        | 8.5E-03         | 2.0         |
| 24            | L -Malic acid                    | 5.0E-02         | 1.6         |
| 25            | L -Ornithine                     | 4.1E-02         | 0.6         |
| 26            | L -Phenylalanine                 | 2.8E-02         | 0.6         |
| 27            | L -Pyroglutamic acid             | 2.9E-02         | 0.7         |
| 28            | L -Threonine                     | 7.3E-05         | 0.4         |
| 29            | Maleic acid                      | 4.1E-03         | 1.5         |
| 30            | Methylmalonic acid               | 5.7E-03         | 0.7         |
| 31            | Niacinamide                      | 3.2E-03         | 0.7         |
| 32            | Nonanoic acid                    | 1.2E-04         | 2.0         |
| 33            | Octadeca-9,12-diynoic acid       | 9.8E-03         | 2.6         |
| 34            | O-phosphoethanolamine            | 1.6E-03         | 0.5         |

|             |                             |         |      |
|-------------|-----------------------------|---------|------|
| 35          | Oxalic acid                 | 7.9E-03 | 2.2  |
| 36          | Propylene glycol            | 1.6E-02 | 1.7  |
| 37          | pyruvate                    | 1.3E-02 | 0.5  |
| 38          | Stearic acid                | 9.7E-04 | 1.3  |
| 39          | Taurine                     | 4.6E-04 | 5.6  |
| 40          | Uracil                      | 4.4E-02 | 1.2  |
| 41          | $\alpha$ -Aminobutyric acid | 5.6E-04 | 0.4  |
| 2DLC-MS (-) |                             |         |      |
| 1           | 2-Methylglutaric acid       | 8.7E-03 | 2.3  |
| 2           | 4-Methyl-2-oxovaleric acid  | 3.1E-02 | 0.7  |
| 3           | 4-Oxoproline                | 3.9E-05 | 0.6  |
| 4           | 5-CMP                       | 4.0E-02 | 1.4  |
| 5           | Hypotaurine                 | 1.4E-03 | 2.2  |
| 6           | L -Glutathione oxidized     | 1.2E-04 | 2.0  |
| 7           | L -Malic acid               | 4.9E-02 | 1.3  |
| 8           | L -Ornithine                | 4.1E-02 | 0.7  |
| 9           | N-acetylalanine             | 1.1E-02 | 1.5  |
| 10          | Pyruvic acid                | 4.7E-02 | 0.5  |
| 11          | Taurine                     | 1.7E-03 | 1.8  |
| 12          | Taurochenodeoxycholic acid  | 7.8E-05 | 8.4  |
| 13          | $\alpha$ -Ketoglutaric acid | 9.8E-03 | 0.4  |
| 2DLC-MS (+) |                             |         |      |
| 1           | 4-Acetamidobutanoic acid    | 1.1E-02 | 1.4  |
| 2           | 4-Guanidinobutyric acid     | 6.5E-05 | 2.9  |
| 3           | Carnitine                   | 1.0E-02 | 0.8  |
| 4           | Cytosine                    | 4.7E-02 | 10.9 |
| 5           | Hypotaurine                 | 1.6E-03 | 2.3  |
| 6           | L -Ornithine                | 3.2E-02 | 0.9  |
| 7           | L -Phenylalanine            | 2.4E-02 | 0.7  |
| 8           | N-acetyl-D-Glucosamine      | 4.5E-02 | 1.5  |
| 9           | Proline                     | 9.2E-03 | 0.9  |
| 10          | Serine                      | 1.8E-02 | 0.9  |
| 11          | Taurine                     | 3.2E-02 | 1.7  |

**Table S5.** Detection of metabolites from the “biosynthesis of unsaturated fatty acid pathway” by different platforms.

| Compound Name                    | GC×GC-MS       | 2DLC-MS(-) | 2DLC-MS(+)     |
|----------------------------------|----------------|------------|----------------|
| $\alpha$ -linolenic acid, ALA    | x <sup>a</sup> | x          | x              |
| Stearidonic acid                 | x              | x          | y <sup>b</sup> |
| Arachidonic acid                 | y              | y          | x              |
| Eicosapentaenoic acid, EPA       | y              | y          | y              |
| Docosapentaenoic acid (DPA)      | x              | y          | y              |
| Docosahexaenoic acid, DHA        | y              | x          | x              |
| Linoleic acid, LA                | y              | x          | x              |
| Gamma-linolenic acid, GLA        | y              | x          | x              |
| Dihomogamma-linolenic acid, DGLA | y              | x          | y              |
| PG2 (prostaglandin G2)           | x              | y          | x              |
| TXA2 (thromboxane A2)            | x              | x          | x              |
| leukotriene B4                   | x              | y          | x              |
| LXA4                             | x              | y          | x              |
| LXB4                             | x              | y          | x              |

<sup>a</sup>x stands for a compound was not detected in the corresponding platform.

<sup>b</sup>y stands for a compound was detected in the corresponding platform.
